# Supplementary material for: Comparison of a 2D/3D imidazole-based MOF and its application as a non-enzymatic electrochemical sensor for the detection of uric acid
Source: Royal Society of Chemistry journal article supplement (doi:10.1039/d2nj02664c), 2022-01-01
Supplement: d2nj02664c1.pdf [file d2nj02664c1.pdf]

## Supplementary Information

### Comparison of 2D/3D Imidazole-Based MOF and Its Applications as Non-Enzymatic Electrochemical Sensors for The Detection of Uric Acid

Syauqi Abdurrahman Abrori<sup>a,b</sup>, Ni Luh Wulan Septiani<sup>b,c</sup>, Nugraha Nugraha<sup>b,d,\*</sup>, Ahmad Nuruddin<sup>b</sup>, Isa Anshori<sup>d,e</sup>, and Brian Yulianto<sup>b,d\*</sup>

<sup>a</sup>Doctoral Program of Engineering Physics, Faculty of Industrial Technology, Institut Teknologi Bandung, Bandung 40132, Indonesia

<sup>b</sup>Advanced Functional Materials Laboratory, Engineering Physics Department, Faculty of Industrial Technology, Institut Teknologi Bandung, Bandung 40132, Indonesia

<sup>c</sup>Research Center for Advanced Materials, National Research and Innovation Agency (BRIN), South Tangerang 15314, Indonesia

<sup>d</sup>Research Center for Nanosciences and Nanotechnology (RCNN), Institut Teknologi Bandung, Bandung 40132, Indonesia

<sup>e</sup>Lab-on-Chip Group, Biomedical Engineering Department, Institut Teknologi Bandung, Bandung 40132, Indonesia

\*Correspondence: [brian@itb.ac.id](mailto:brian@itb.ac.id); [nugraha@tf.itb.ac.id](mailto:nugraha@tf.itb.ac.id).

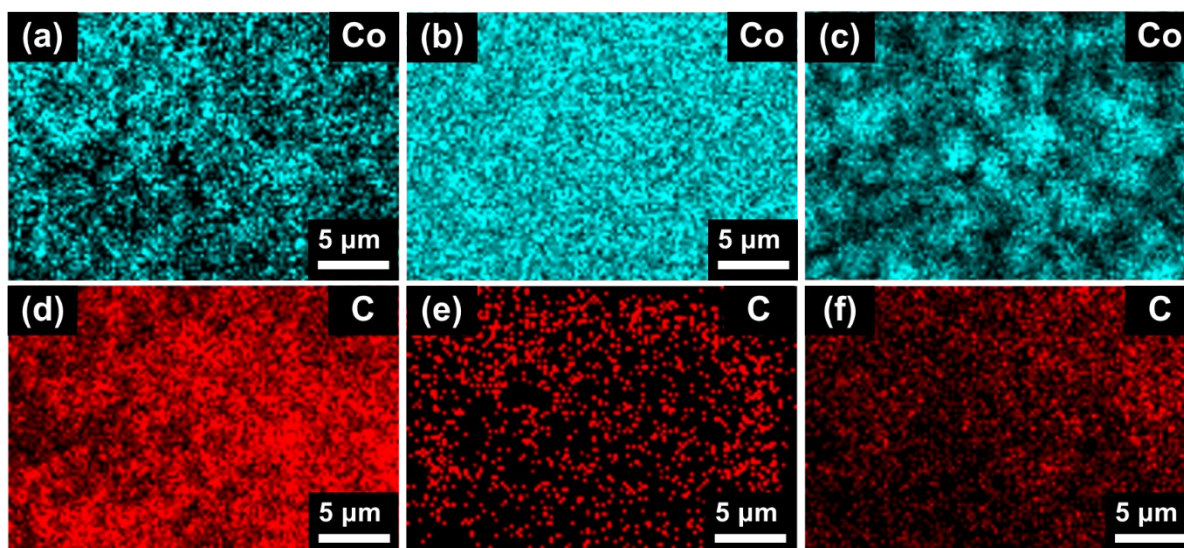

Figure S1. Energy Dispersive Spectroscopy (EDS) Mapping of Me-ZIF-67 (a,d), M-ZIF-67 (b,e), dan W-ZIF-67 (c,f) showing the element distribution of Cobalt and Carbon.

#### Elemental weight percent analyses

| Sample/element | Cobalt (wt%) | Carbon (wt%) |
|----------------|--------------|--------------|
| Me-ZIF-67      | 11.7         | 88.3         |
| M-ZIF-67       | 77.8         | 22.2         |
| W-ZIF-67       | 42.3         | 57.7         |
